# Supplementary material
Source: PubMed Central journal article supplement (PMC5407735)

1 **Supplemental material A**

2 **Figure A1**

3 Kaplan – Meier curve event free survival (cardiac events)

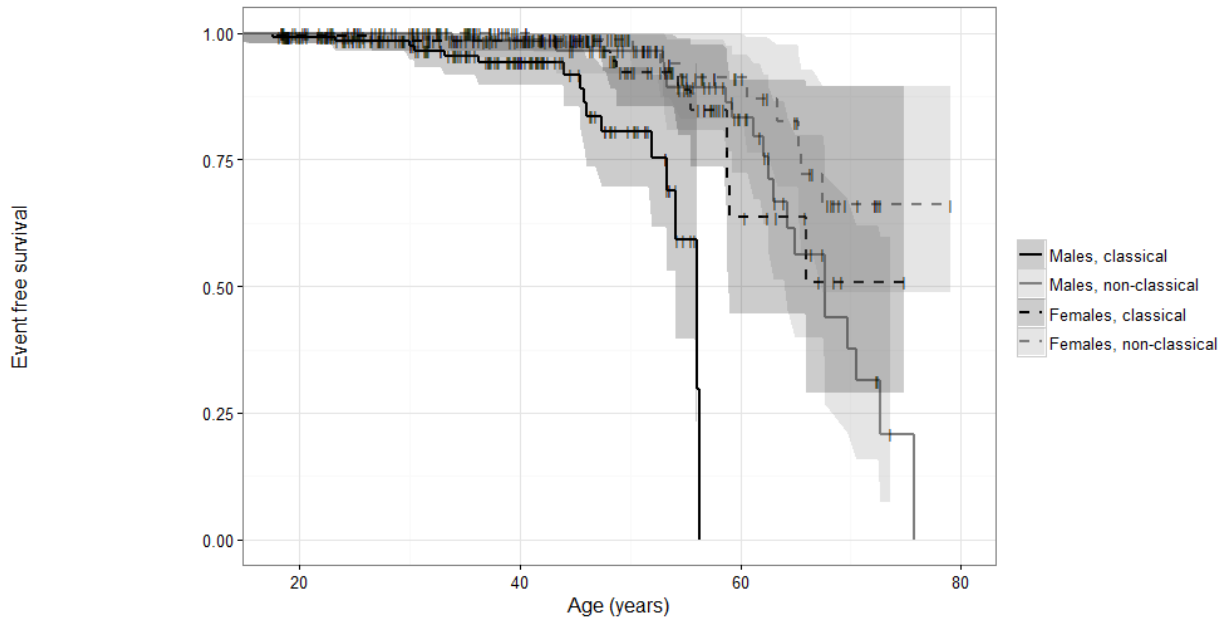

|                        |     |    |    |   |
|------------------------|-----|----|----|---|
| Males, classical       | 131 | 57 | 0  | 0 |
| Males, non-classical   | 65  | 56 | 24 | 0 |
| Females, classical     | 136 | 88 | 9  | 0 |
| Females, non-classical | 142 | 81 | 23 | 0 |

4

5 *Event free survival (cardiac event) stratified for sex and phenotype. Crosses indicate censoring (i.e. first visit).*

1 **Figure A2**

2 Kaplan – Meier curve event free survival (cerebral events)

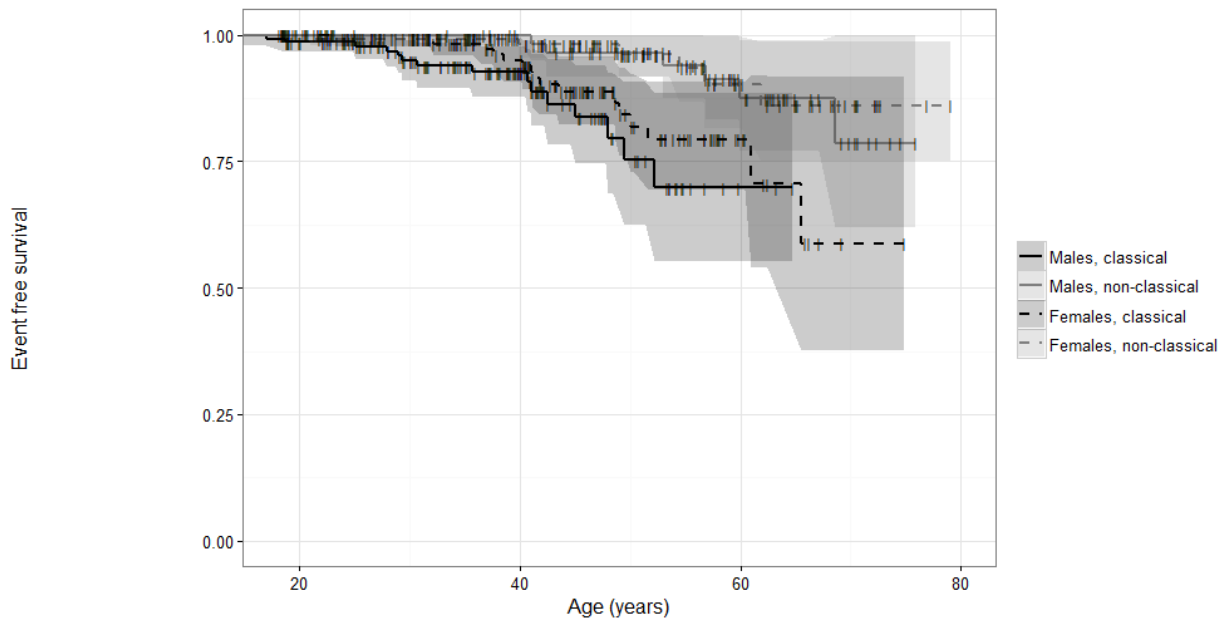

|                        |     |    |    |   |
|------------------------|-----|----|----|---|
| Males, classical       | 130 | 53 | 2  | 0 |
| Males, non-classical   | 65  | 57 | 23 | 0 |
| Females, classical     | 137 | 86 | 11 | 0 |
| Females, non-classical | 142 | 80 | 23 | 0 |

3

4 *Event free survival (cerebral event) stratified for sex and phenotype. Crosses indicate censoring (i.e. first*  
 5 *visit).*

1 **Figure A3**

2 Kaplan – Meier curve event free survival (renal events)

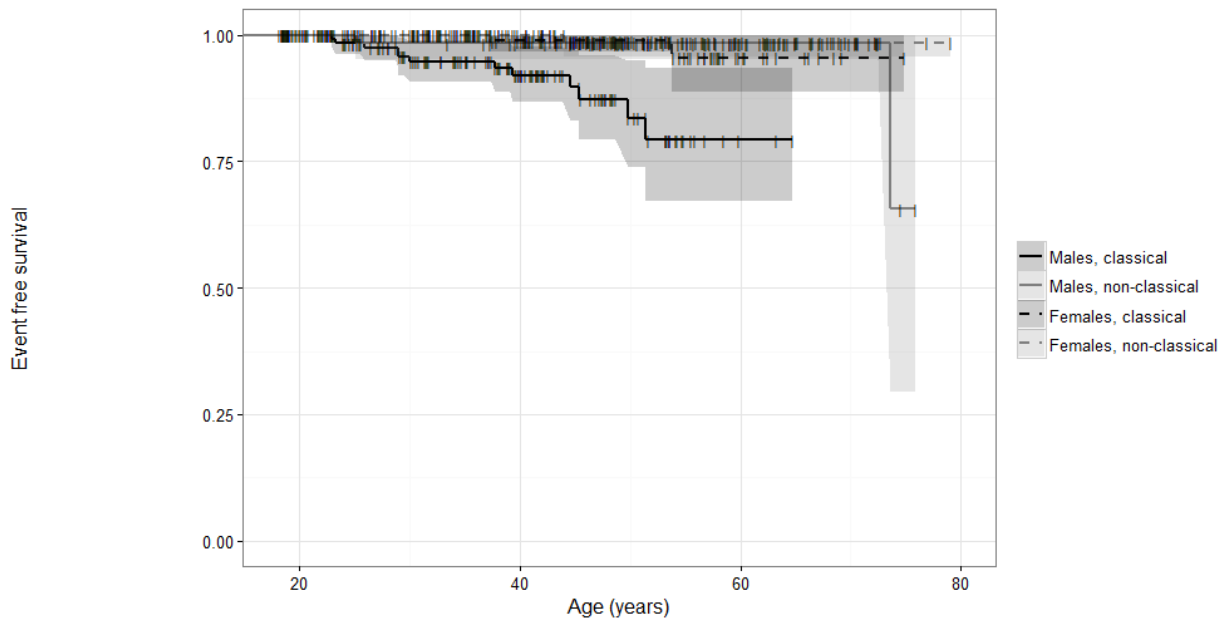

|                        |     |    |    |   |
|------------------------|-----|----|----|---|
| Males, classical       | 132 | 59 | 2  | 0 |
| Males, non-classical   | 65  | 56 | 27 | 0 |
| Females, classical     | 137 | 87 | 11 | 0 |
| Females, non-classical | 142 | 81 | 24 | 0 |

3

4 *Event free survival (renal event) stratified for sex and phenotype. Crosses indicate censoring (i.e. first visit).*

5

1 **Supplemental material B**

2

3 **Figure B1**

4 eGFR versus age, stratified for phenotype and CKD stage in males

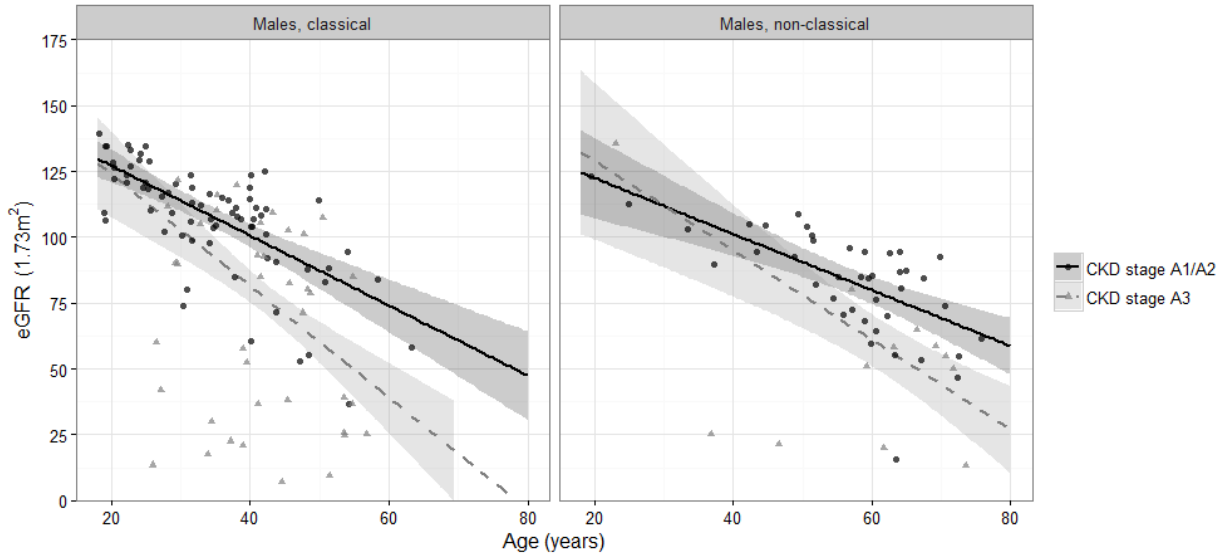

5

6 *Robust linear regression of eGFR stratified for phenotype and CKD stage in males. Black dots represent*  
7 *classical FD patients, grey pyramids represent non-classical FD patients.*

8

9

10 **Figure B2**

11 eGFR versus age, stratified for phenotype and CKD stage in females

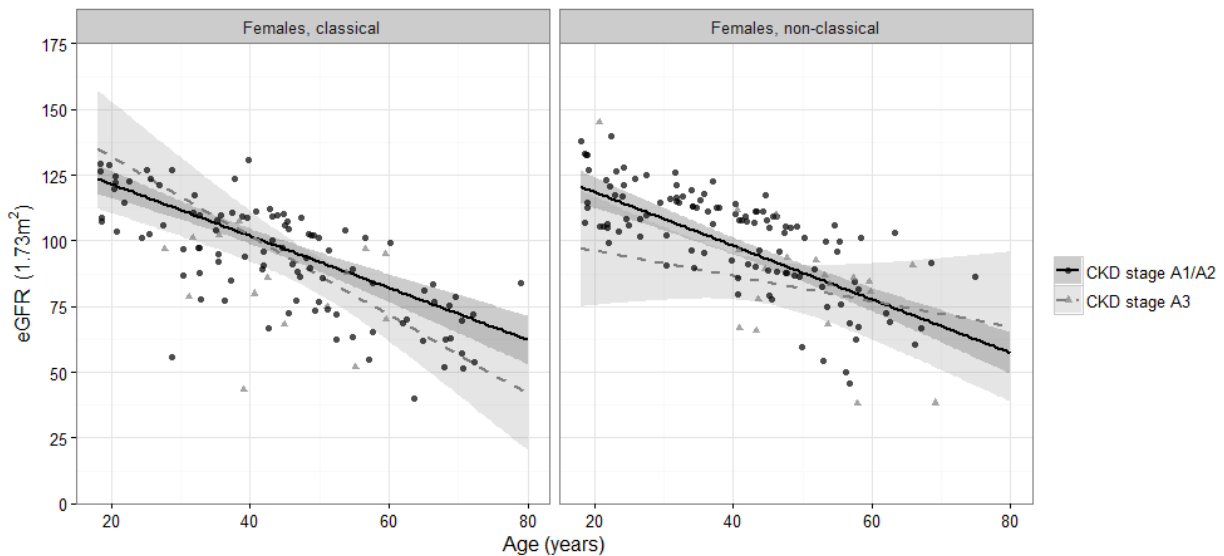

12

13 *Robust linear regression of eGFR stratified for phenotype and CKD stage in females. Black dots represent*  
14 *classical FD patients, grey pyramids represent non-classical FD patients.*

15

1 **Supplemental material C**

2

3 **Figure C1**

4 Relative wall thickness versus age, stratified for sex and phenotype

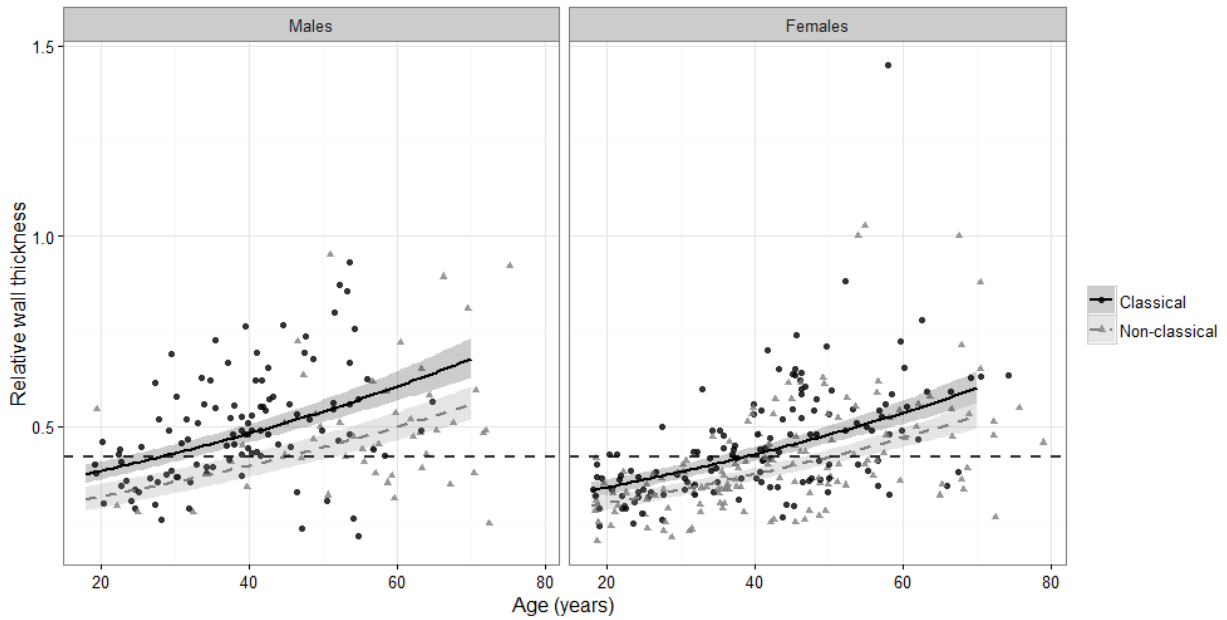

5

6 *Log-linear regression curve of the RWT and age, stratified for sex and phenotype. The horizontal dashed line*  
7 *represents the upper reference limit of the RWT (0.42)<sup>23</sup>. Black dots represent classical FD patients, grey*  
8 *pyramids represent non-classical FD patients.*

9

1  
2  
3  
4

**Figure C2**

Relative wall thickness versus left ventricular mass, stratified for sex and phenotype

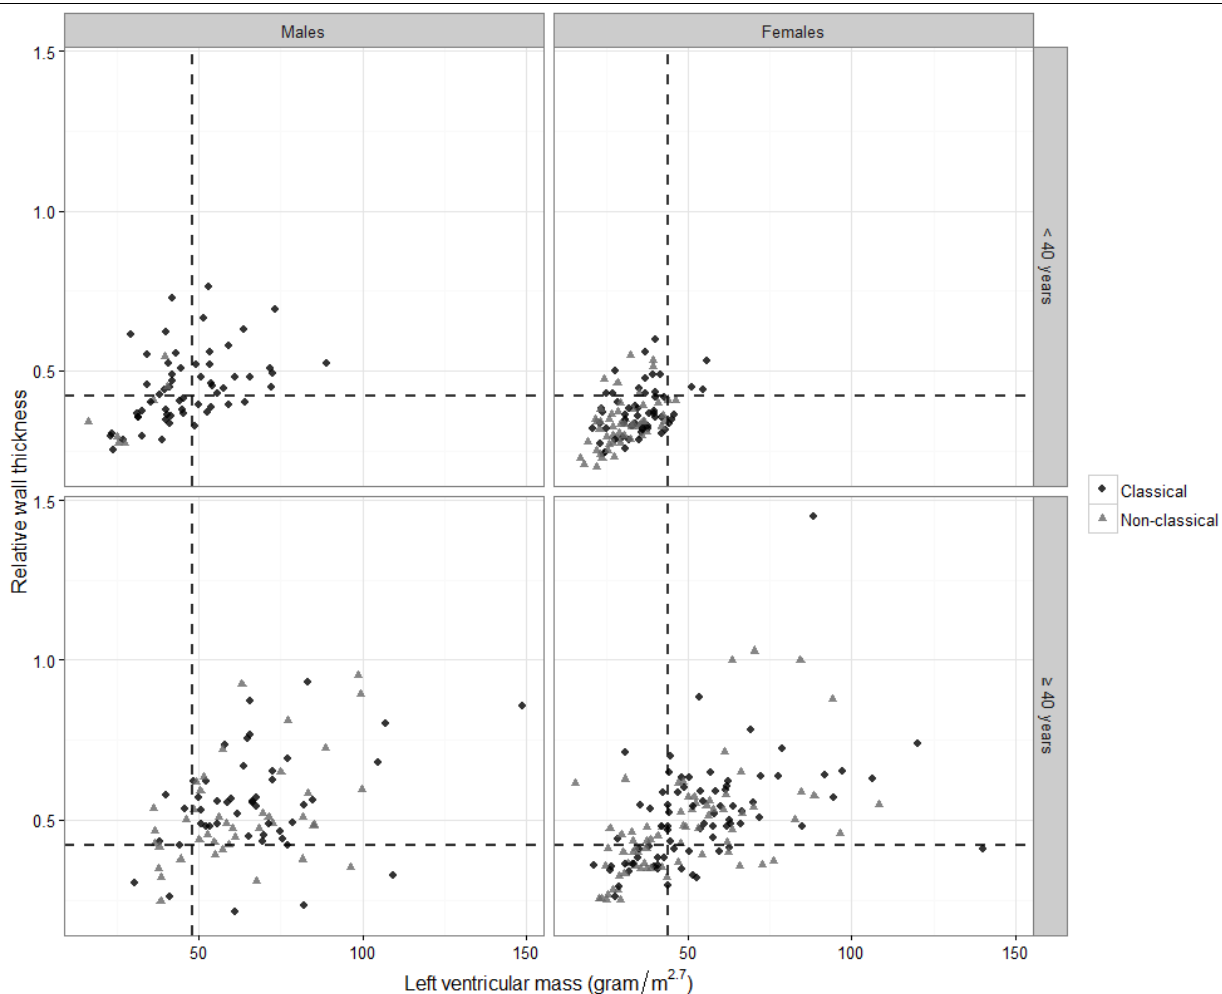

5  
6  
7  
8  
9  
10

Relationship between left ventricular mass and relative wall thickness, stratified for sex, phenotype and age. The horizontal dashed line represents the upper reference limit of the RWT (0.42), the vertical lines represent upper reference limit of the LVM (males: 48 gram/m<sup>2.7</sup>, females: 44 gram/m<sup>2.7</sup>)<sup>23</sup>. Black dots represent classical FD patients, grey pyramids represent non-classical FD patients.

1 **Supplemental material D**

2

3 **Figure D1**

4 Late gadolinium enhancement in male patients

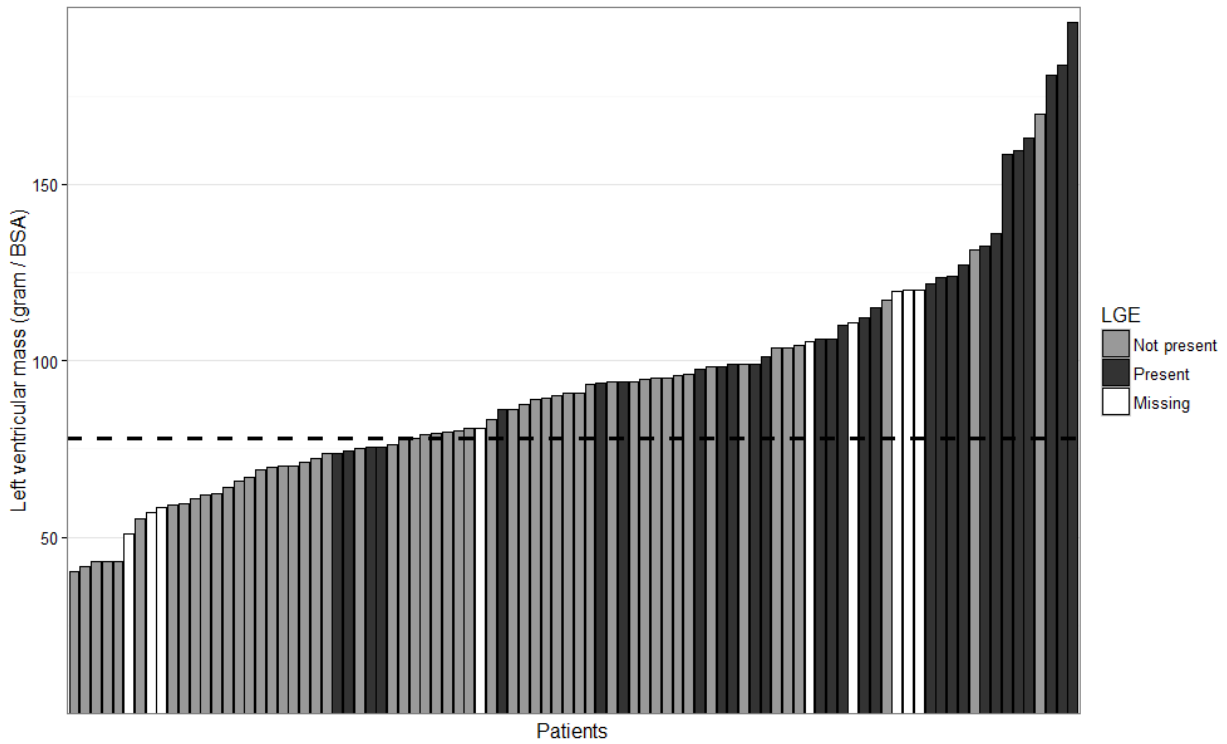

5

6 *Relationship between late gadolinium enhancement and left ventricular in female patients. Each bar*  
7 *represents an individual patient. The dashed black line represents the upper reference limit for males (78*  
8 *gram/m<sup>2</sup>).*

9

1 **Figure D2**  
2 Late gadolinium enhancement in female patients

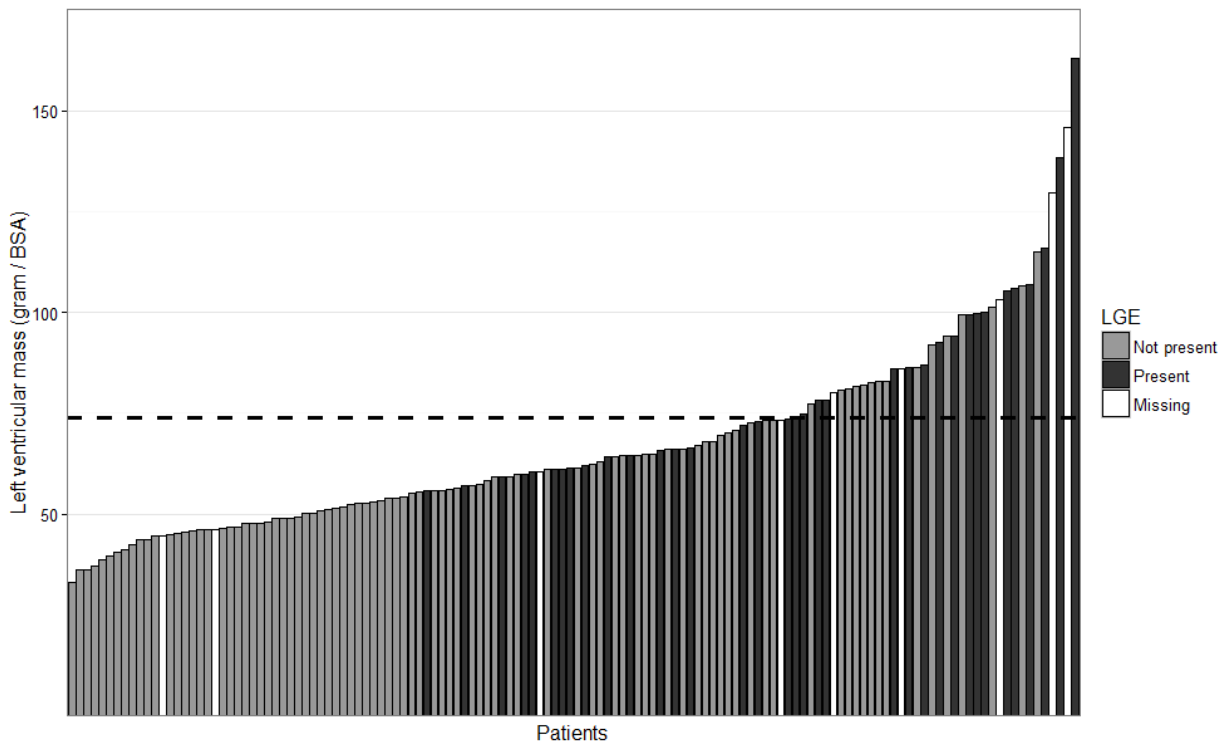

3  
4 Relationship between late gadolinium enhancement and left ventricular in female patients. Each bar  
5 represents an individual patient. The dashed black line represents the upper reference limit for females (74  
6 gram/m<sup>2</sup>).

7



1 **Supplemental material E**

2 Comparison of isotope labeled lysoGb3 and the glycine labeled lysoGb3 as internal standard for lysoGb3  
3 quantification using tandem-mass spectrometry. The intraclass correlation coefficient was 0.985 (95% CI:  
4 0.973-0.991;  $p < 0.001$ ).

5 **Figure E1**

6 Bland-Altman plot

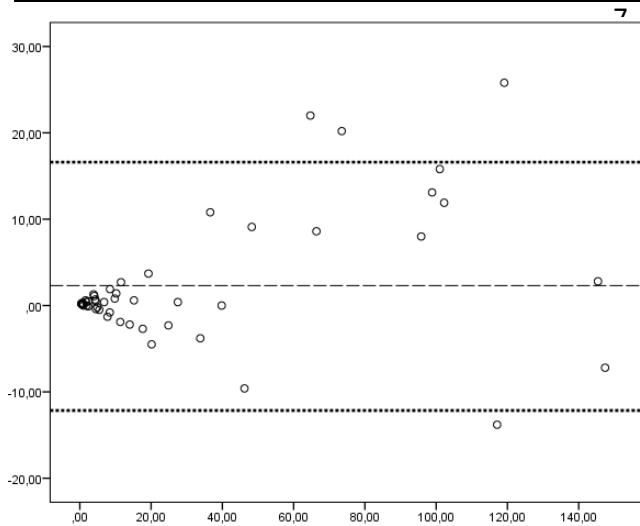

16 **Figure E2**

17 Bland-Altman plot (values up to 20 pmol/l)

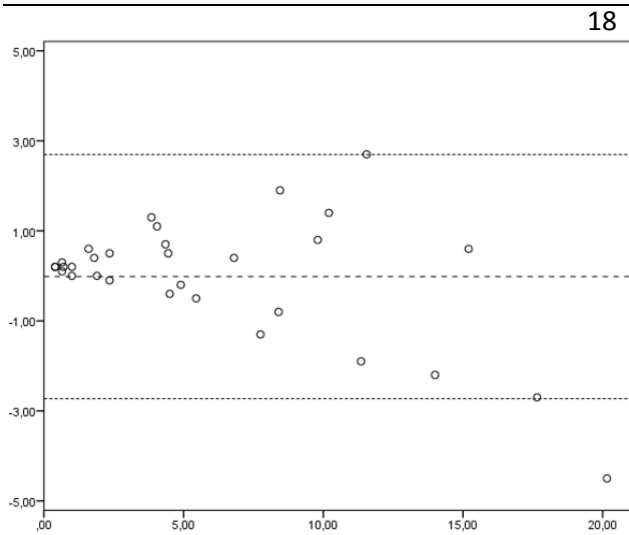

Supplement: ASN.2016090964SupplementaryData.pdf [file ASN.2016090964SupplementaryData.pdf]
